# Supplementary material for: The efficacy of high-flow nasal cannula (HFNC) versus non-invasive ventilation (NIV) in patients at high risk of extubation failure: a systematic review and meta-analysis
Source: Springer Nature journal article supplement (doi:10.1186/s40001-023-01076-9), 2023-03-14
Supplement: MOESM2 [file 24623252]

Additional file 2 Medline search

|    |                                                                                                                                                                                                                                                                                                                                                                                              |
|----|----------------------------------------------------------------------------------------------------------------------------------------------------------------------------------------------------------------------------------------------------------------------------------------------------------------------------------------------------------------------------------------------|
| #1 | <pre> ((((("Noninvasive Ventilation"[Mesh]) OR ("noninvasive ventilation"[Title/Abstract])) OR ("non invasive ventilation"[Title/Abstract])) OR ("noninvasive positive pressure ventilation"[Title/Abstract])) OR ("non invasive positive pressure ventilation"[Title/Abstract])) OR ("niv"[Title/Abstract])) OR ("nippv"[Title/Abstract]) </pre>                                            |
| #2 | <pre> ((((("humidified high flow nasal cannula therapy"[Title/Abstract]) OR ("high flow nasal cannulae"[Title/Abstract])) OR ("nasal high flow oxygen therapy"[Title/Abstract])) OR ("high flow nasal cannula oxygen therapy"[Title/Abstract])) OR ("high flow nasal cannula"[Title/Abstract])) OR ("hfct"[Title/Abstract])) OR ("hfnc"[Title/Abstract])) OR ("hhfn"[Title/Abstract]) </pre> |
| #3 | #1 AND #2                                                                                                                                                                                                                                                                                                                                                                                    |
